# Supplementary material for: Inhibition of sphingolipid de novo synthesis counteracts muscular dystrophy
Source: PubMed Central journal article supplement (PMC8797791; doi:10.1126/sciadv.abh4423), 2022-01-28
Supplement: sciadv.abh4423_sm.pdf [file sciadv.abh4423_sm.pdf]

Supplementary Materials for  
**Inhibition of sphingolipid de novo synthesis counteracts muscular dystrophy**

Pirkka-Pekka Laurila, Peiling Luan, Martin Wohlwend, Nadège Zanou, Barbara Crisol,  
Tanes Imamura de Lima, Ludger J. E. Goeminne, Hector Gallart-Ayala, Minhong Shong,  
Julijana Ivanisevic, Nicolas Place, Johan Auwerx\*

\*Corresponding author. Email: [admin.auwerx@epfl.ch](mailto:admin.auwerx@epfl.ch)

Published 28 January 2022, *Sci. Adv.* **8**, eabh4423 (2022)  
DOI: [10.1126/sciadv.abh4423](https://doi.org/10.1126/sciadv.abh4423)

**The PDF file includes:**

Figs. S1 to S5  
Table S2  
Legend for table S1

**Other Supplementary Material for this manuscript includes the following:**

Table S1

## Supplementary figures

**Figure S1.** Sphinganine (left), dihydroceramide (middle), and ceramide (right) levels in quadriceps muscle of (A) 4 week old and (B) 10 week old C57/BL10 and *mdx* mice.

**Figure S2.** (A) Proportion of variance explained by each principal component of the sphingolipid *de novo* synthesis pathway in skeletal muscle of symptomatic DMD patients and controls (E-GEOD-38417). Levels of alanine aminotransferase (B) and aspartate aminotransferase (C) in WT mice, *mdx* mice, and *mdx* mice treated with myriocin. (D) Quantification of developed force at 25s (middle) of the fatigue protocol in EDL muscle of mice. Results are expressed relative to the developed force at the 1st tetanus. (E) Quantification of force drop during the 50s fatigue protocol in EDL muscle from WT (C57/BL10), *mdx*, and *mdx* mice treated with myriocin (force quantified every 10th tetanus). (F) Quantification of force drop during eccentric EDL muscle contractions in WT (C57/BL10), *mdx*, and *mdx* mice treated with myriocin. (G) Representative traces of cytosolic Ca<sup>2+</sup> transients in isolated FDB muscle fibers upon 2.5 mM caffeine stimulation (SR Ca<sup>2+</sup> store) and after 2 mM CaCl<sub>2</sub> (SOCE). (H) Ca<sup>2+</sup> amplitude (SR Ca<sup>2+</sup> store) upon 2.5 mM caffeine stimulation as percentage of C57/BL10. (I) Ca<sup>2+</sup> amplitude (SR Ca<sup>2+</sup> store) upon 40 μM histamine stimulation as percentage of C57/BL10. (J) Sarcoplasmic reticulum Ca<sup>2+</sup> uptake after 2.5 mM caffeine stimulation as percentage of Ca<sup>2+</sup> peak. All data are shown as mean ± SEM. Statistical significance is calculated using Student's two-tailed T test with BH adjustment for FDR. \*BH FDR < 0.05, \*\*BH FDR < 0.01, and \*\*\*BH FDR < 0.001.

**Figure S3.** Sphinganine (A), dihydroceramide (B), and ceramide (C) levels in primary bone marrow derived macrophages of C57/BL10 or *mdx* mice. For A-C, statistical significance is calculated using Student's two-tailed T test with BH adjustment for FDR. All data are shown as mean ± SEM. \*BH FDR < 0.05, \*\*BH FDR < 0.01, and \*\*\*BH FDR < 0.001.

**Figure S4.** Sphinganine (left), dihydroceramide (middle), and ceramide (right) levels in (A) diaphragm and (B) heart tissue of C57/BL10 or *mdx* mice. For A-B, statistical significance is calculated using Student's two-tailed T test with BH adjustment for FDR. All data are shown as mean ± SEM. \*BH FDR < 0.05, \*\*BH FDR < 0.01, and \*\*\*BH FDR < 0.001.

**Figure S5.** (A) Immunostaining of PDGFR, a marker of FAPs, and DAPI in diaphragm. Scale bar, 50 μm. (B) Immunostaining of PDGFR, and DAPI in TA. Scale bar, 50 μm.

**Figure S1**

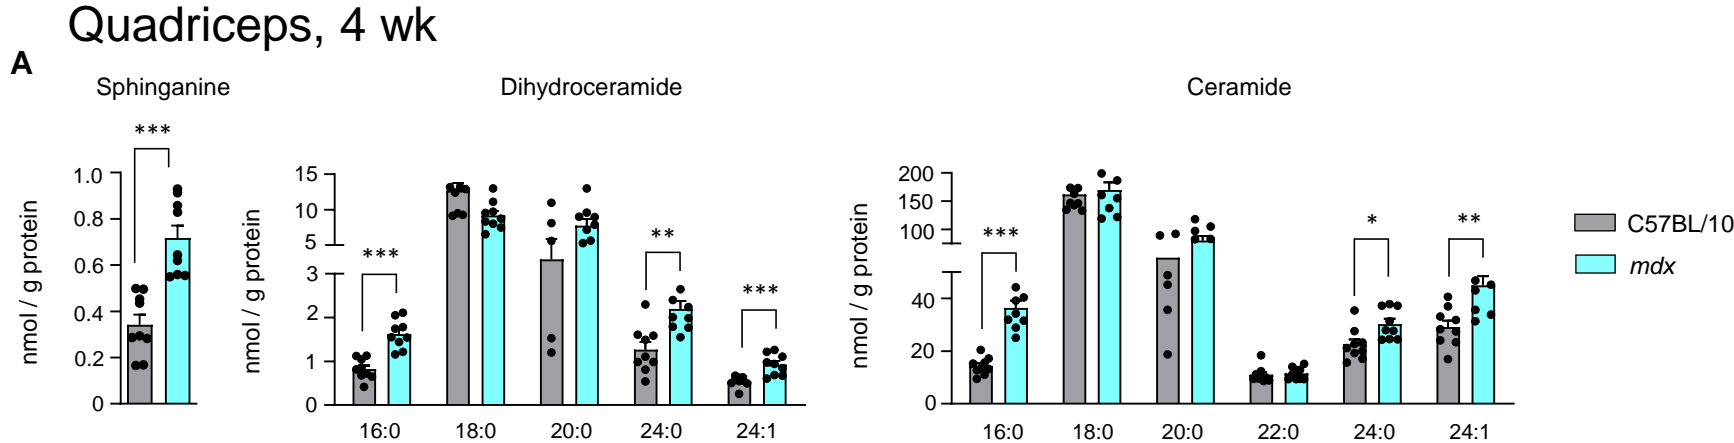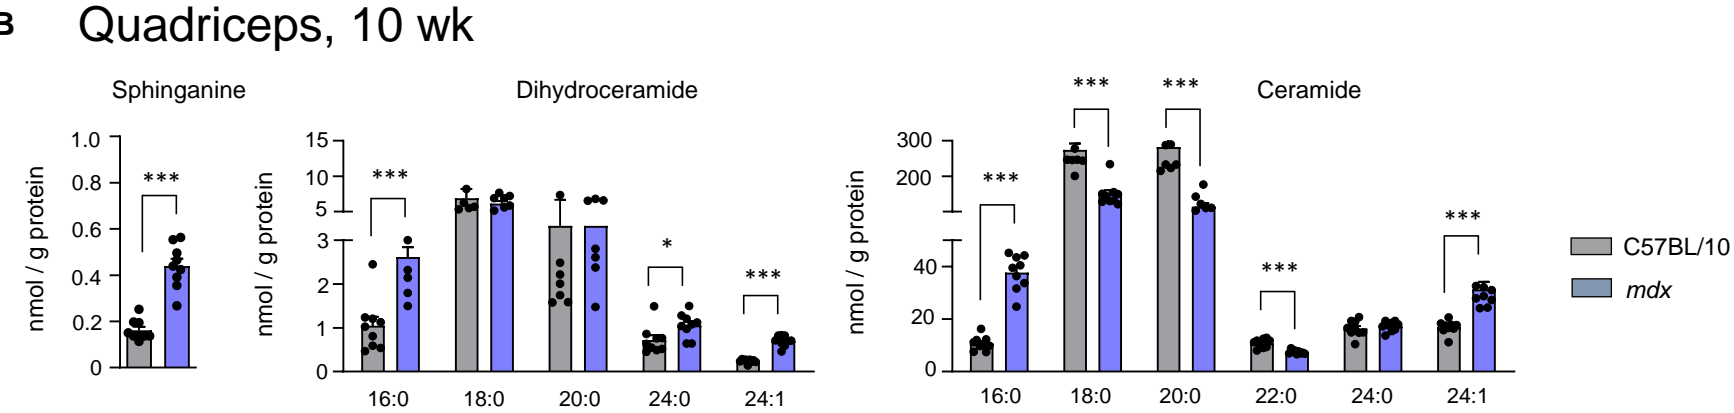

# Figure S2

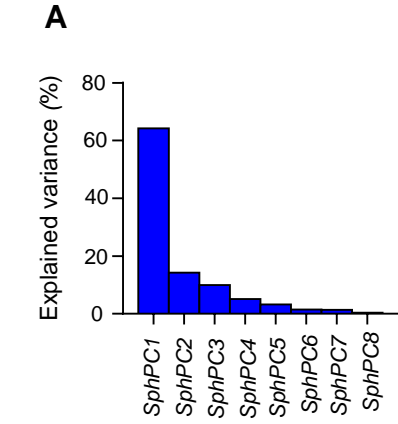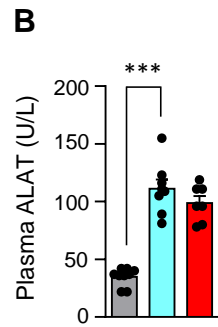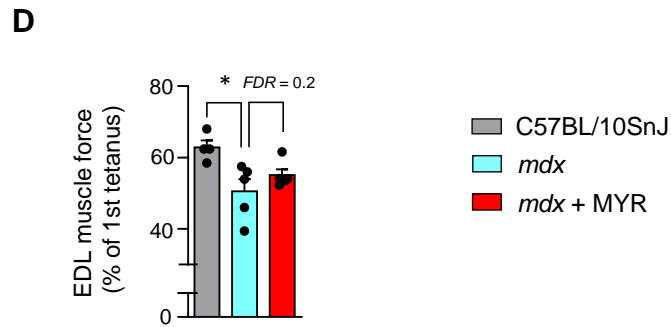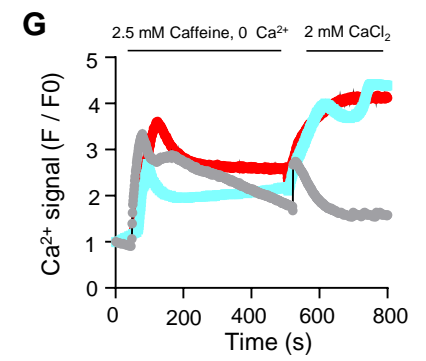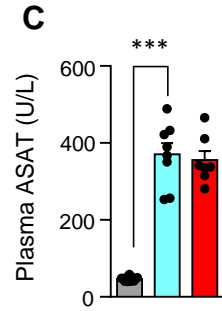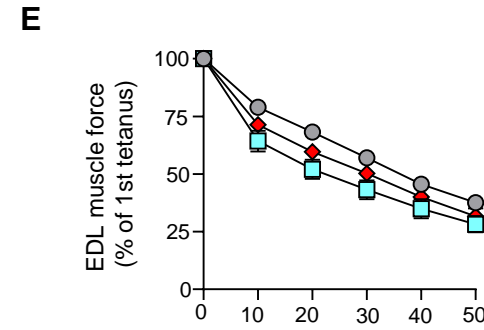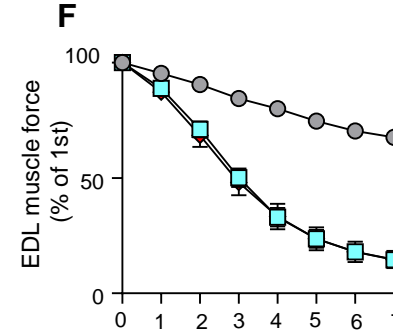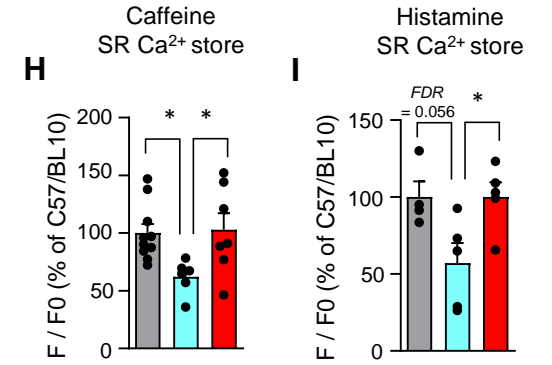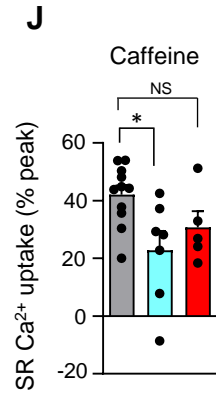

Figure S3

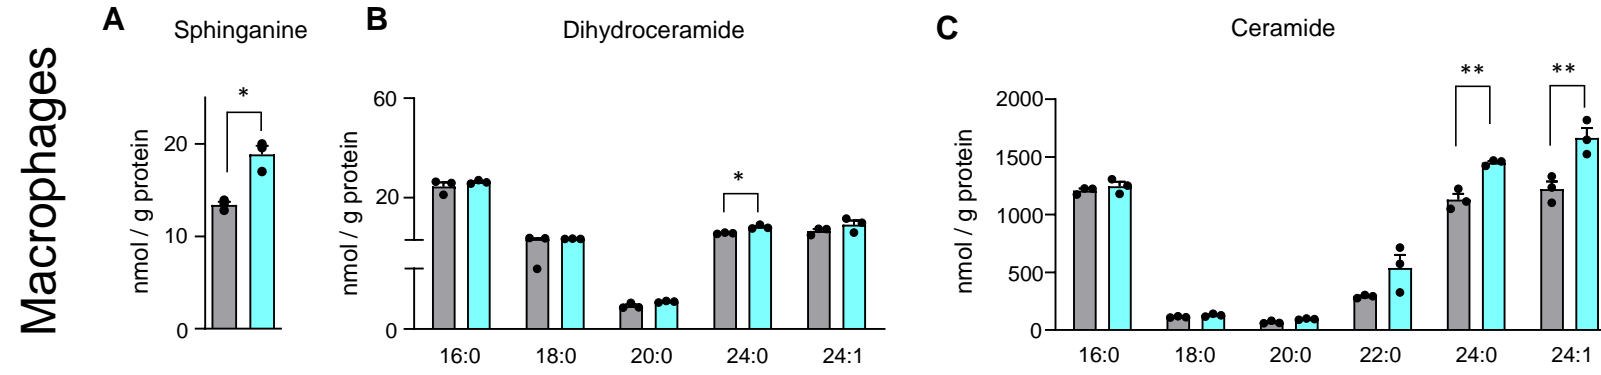

Figure S4

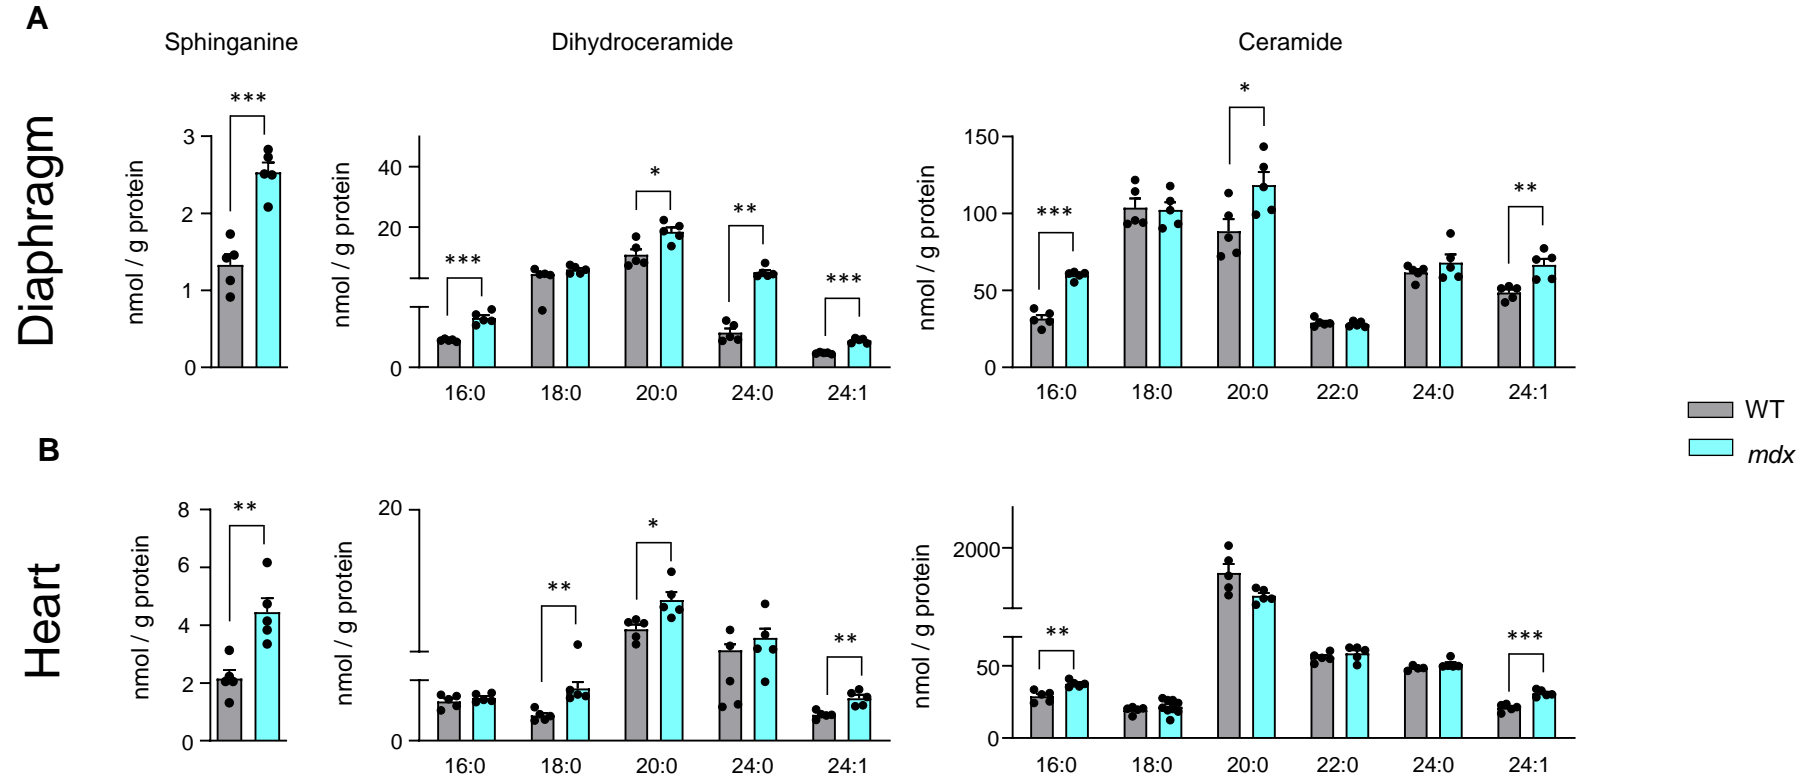

Figure S5

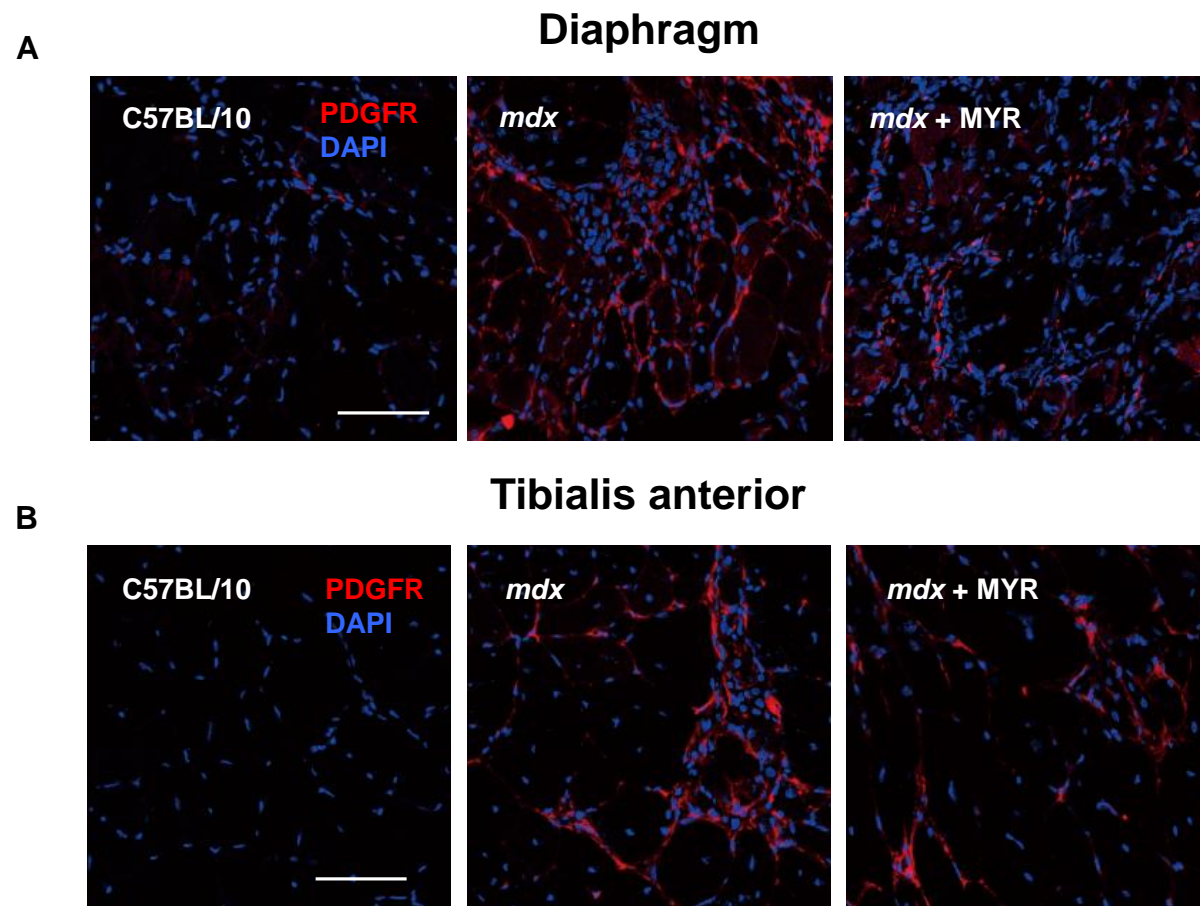

**Supplementary Table 1.** Pathways correlated with the first principal component of sphingolipid *de novo* synthesis pathway (please see separate file).

**Supplementary Table 2.** List of primers.

| <b>Gene symbol (mouse)</b> | <b>Forward</b>           | <b>Reverse</b>           |
|----------------------------|--------------------------|--------------------------|
| <i>Cd163</i>               | TCCACACGTCCAGAACAGTC     | CCTTGGAAACAGAGACAGGC     |
| <i>Retnla</i>              | ACCTTTCCTGAGATTCTGCCCC   | CAGTGGTCCAGTCAACGAGTAAGC |
| <i>Il10</i>                | TGAATTCCCTGGGTGAGAAGCTGA | TGGCCTTGTAGACACCTTGGTCTT |
| <i>Il6</i>                 | GCCTTCTTGGGACTGATGCT     | TGCCATTGCACAACCTCTTTTCT  |
| <i>Il1b</i>                | TGCCATTGCACAACCTCTTTTCT  | GGTGGAGAGCTTTCAGCTCATAT  |
| <i>iNOS</i>                | CCCTTCAATGGTTGGTACATGG   | ACATTGATCTCCGTGACAGCC    |
| <i>B2m</i>                 | TTCTGGTGCTTGTCTCACTG     | TATGTTCGGCTTCCCATTCT     |
